# Supplementary material for: Influence of ionic liquid and ionic salt on protein against the reactive species generated using dielectric barrier discharge plasma
Source: PubMed Central journal article supplement (PMC4674715; doi:10.1038/srep17781), 2015-12-10
Supplement: srep17781-s1.pdf [file srep17781-s1.pdf]

## Supporting Information

### Influence of ionic liquid and ionic salt on protein against the reactive species generated using dielectric barrier discharge plasma

Pankaj Attri<sup>1,2</sup>, Thapanut Sarinont<sup>2</sup>, Minsup Kim<sup>3</sup>, Takaaki Amano<sup>2</sup>, Kazunori Koga<sup>2\*</sup>, Art E. Cho<sup>3\*</sup>, Eun Ha Choi<sup>1\*</sup>, Masaharu Shiratani<sup>2\*</sup>

<sup>1</sup>*Plasma Bioscience Research Center / Department of Electrical and Biological Physics, Kwangwoon University, Seoul, Korea.*

<sup>2</sup>*Graduate School of Information Science and Electrical Engineering, Kyushu University Fukuoka, Japan*

<sup>3</sup>*Department of Bioinformatics, Korea University, Sejong, Korea*

### Synthesis of Diethylammonium dihydrogen phosphate (DEAP)

The synthesis of ionic liquids was carried out in a 250 ml round-bottomed flask, which was immersed in a water-bath and fitted with a reflux condenser. Phosphoric acid (1 mol) was dropped into the diethylamine (1 mol) at 70 °C for 1 h. The reaction mixture was heated at 80 °C with stirring for 2 h to ensure that the reaction had proceeded to completion. The reaction mixture was then dried at 80 °C until the weight of the residue was constant.

### Figure Captions

**Figure S1:** Physical and chemical parameters changed after the plasma treatment in different gases plasma such as (a) pH; (b) temperature; (c) NO<sub>2</sub><sup>-</sup> and (d) NO<sub>3</sub><sup>-</sup>.

**Figure S2:** Fluorescence analysis of OH radicals using TA solution in (a) water; (b) 2 % (w/v) NaCl solution and (c) 2 % (w/v) DEAP IL solution after treatment with DBD plasma using O<sub>2</sub> feeding gas.

**Figure S3:** ESR spectra of OH radicals in the presence of O<sub>2</sub> plasma for 10 min treatment with or without presence of 2 % NaCl.

**Figure S4:** ESR spectra of OH and H radicals in the presence of N<sub>2</sub> plasma for 10 min treatment with or without presence of 2 % NaCl.

**Figure S5:** Fluorescence analysis of Hb after treatment with different gases plasma (a) Hb treatment in water; (b) Hb treatment in the presence of 2% NaCl solution and (c) Hb treatment in the presence of 2% DEAP IL solution after DBD plasma treatment with different feeding gases, such as Air (red), Ar (blue), He (cyan), NO (10%) + N<sub>2</sub> (orange) and N<sub>2</sub> (magenta).

**Figure S6:** Schematic depiction of the Hydrogen bonding of DEAP and DMPO.

**Figure S7:** Schematic depiction of (a) dimension of the DBD used in current work and (b) Current & voltage graph of DBD.

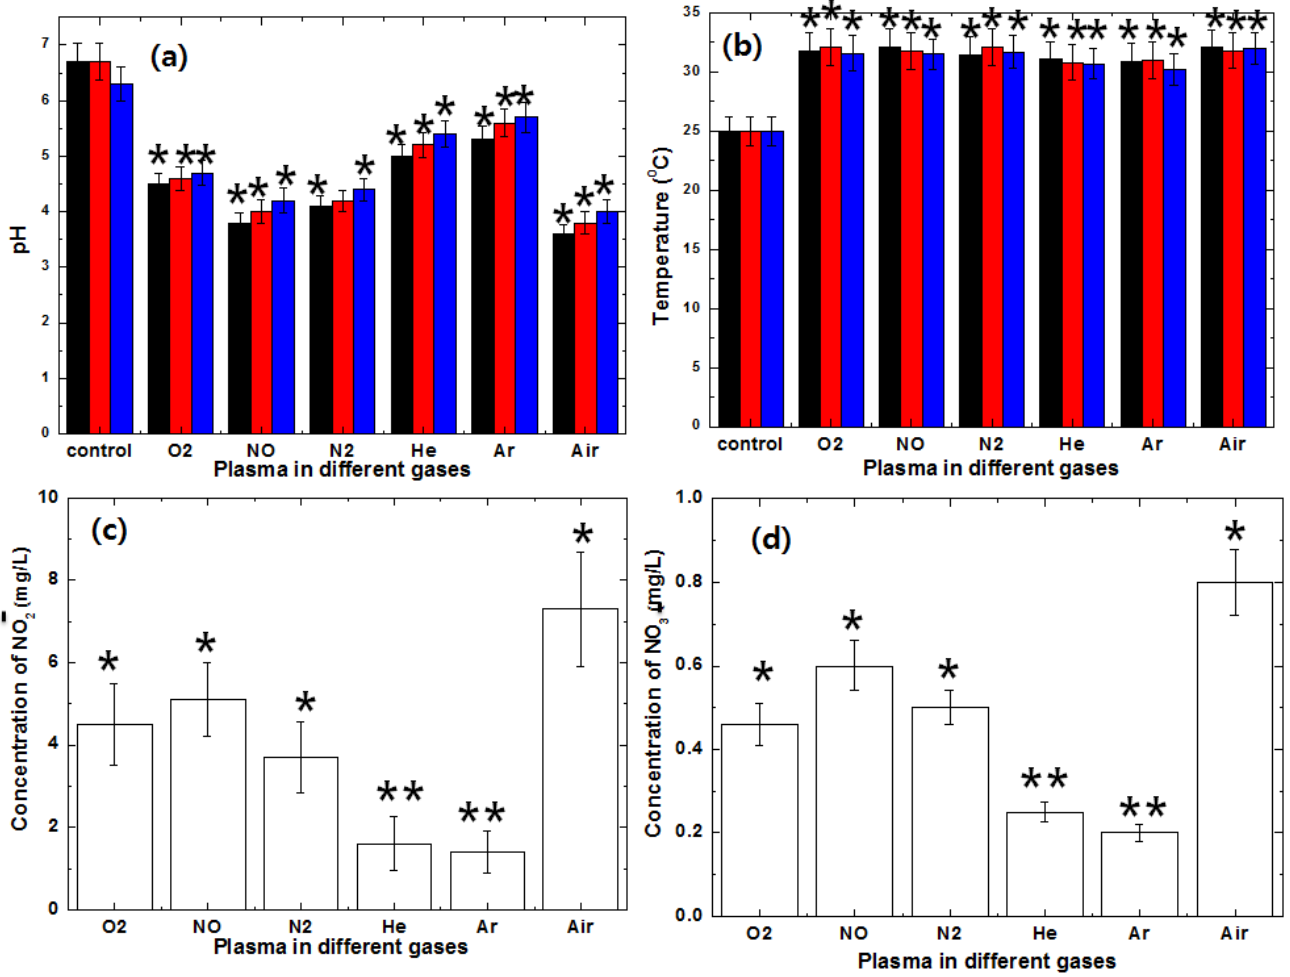

**Figure S1**

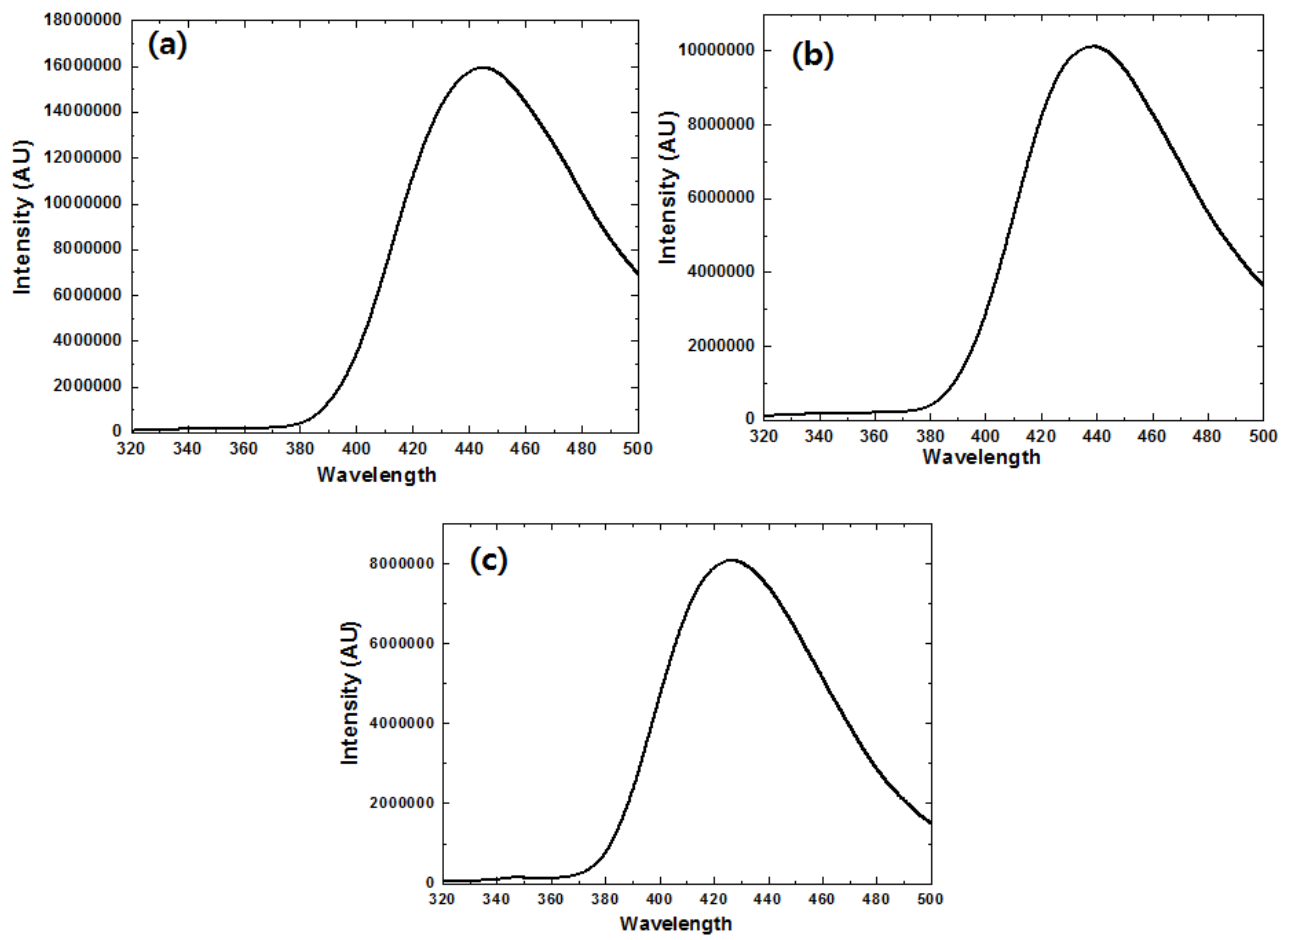

Figure S2

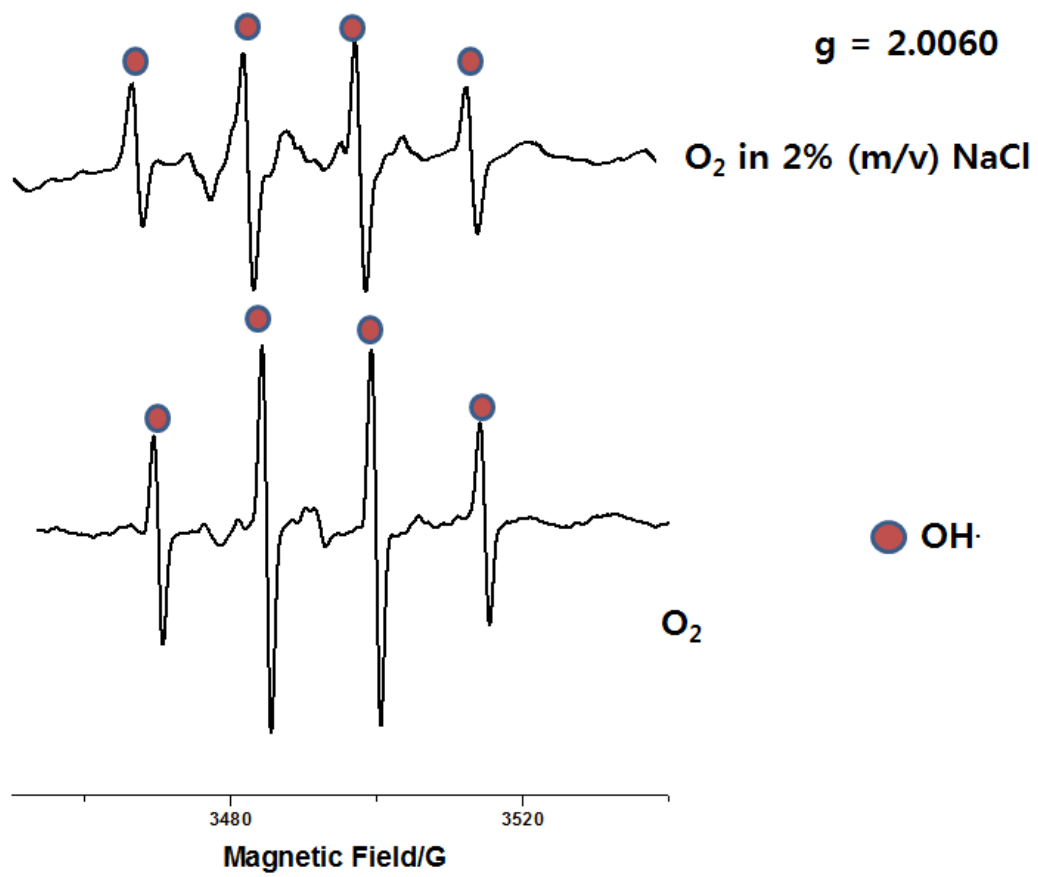

Figure S3

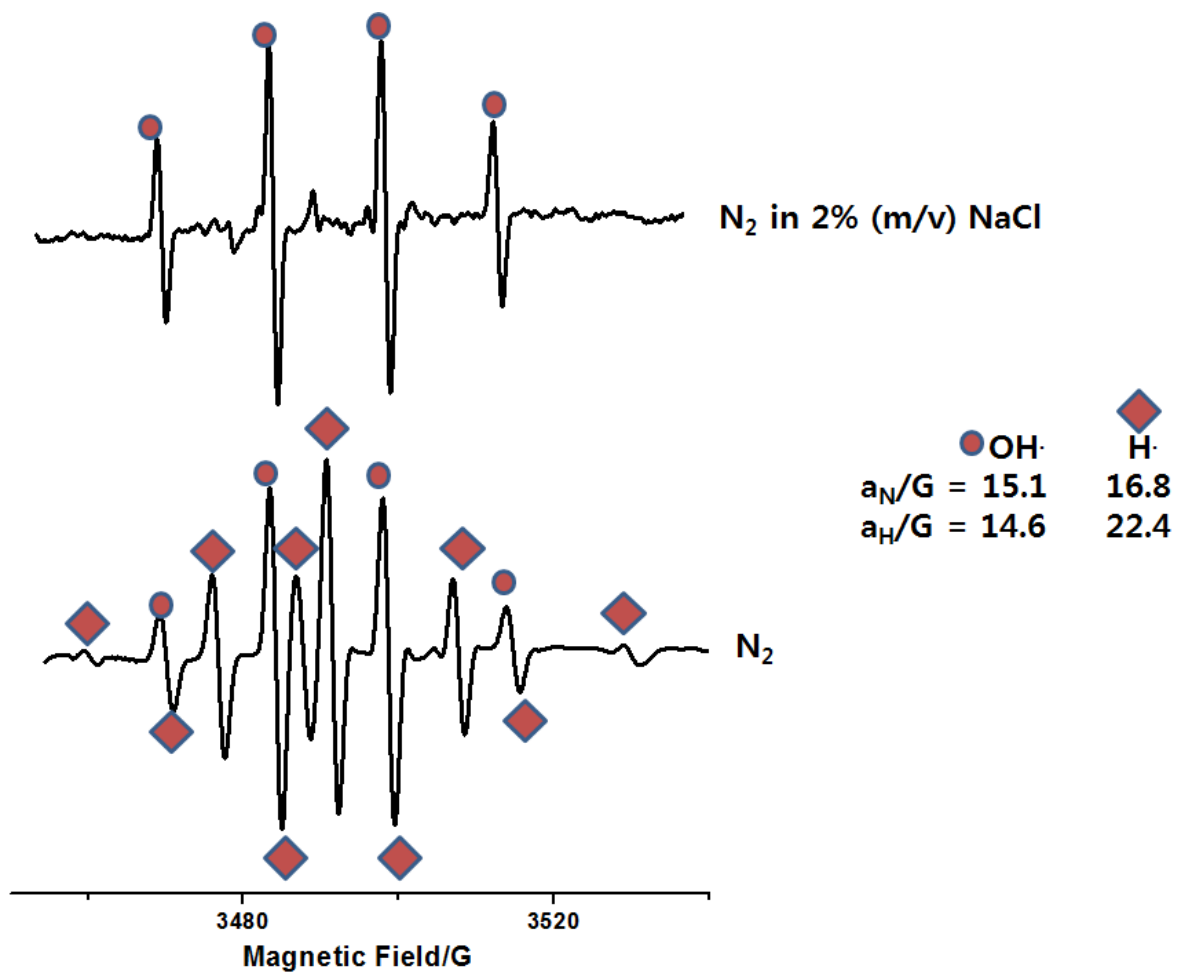

Figure S4

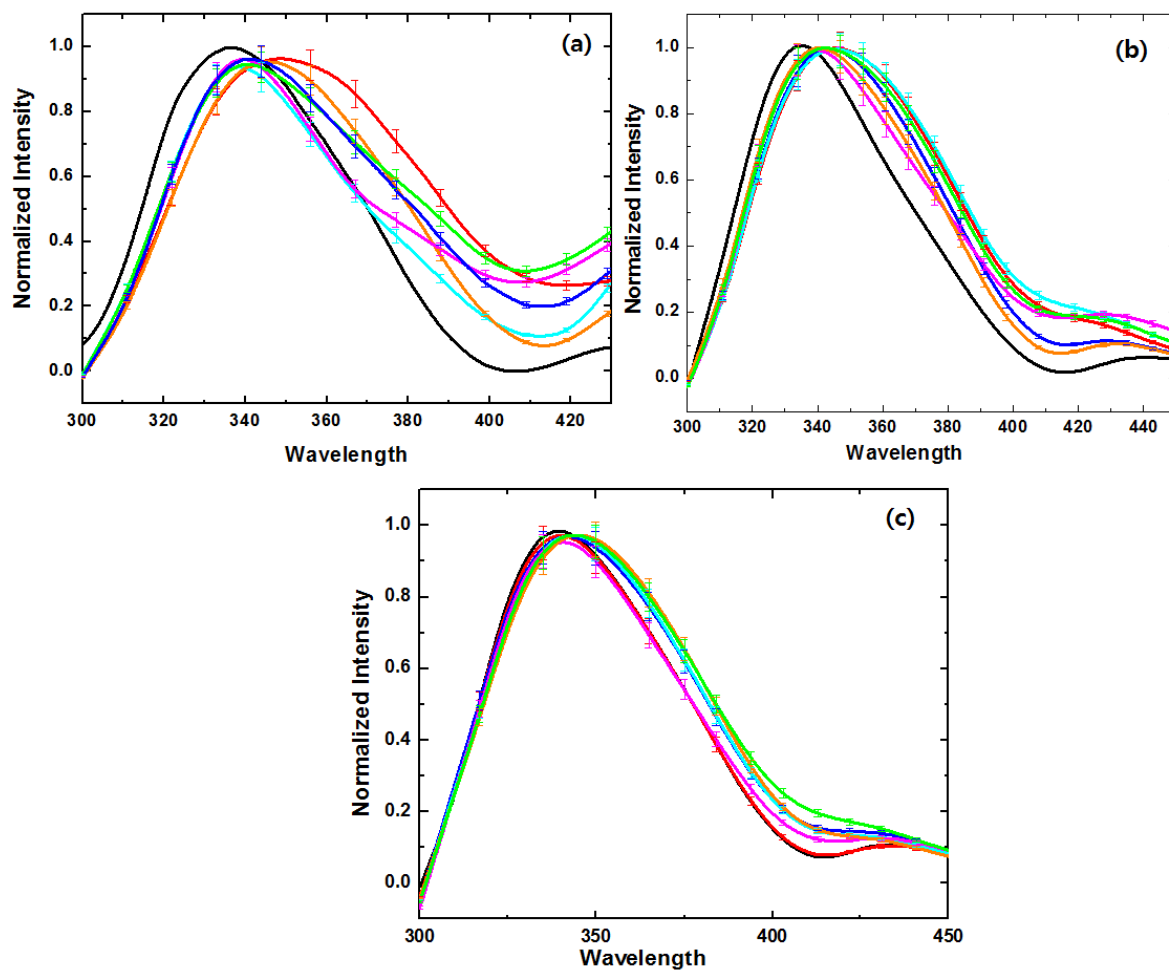

Figure S5

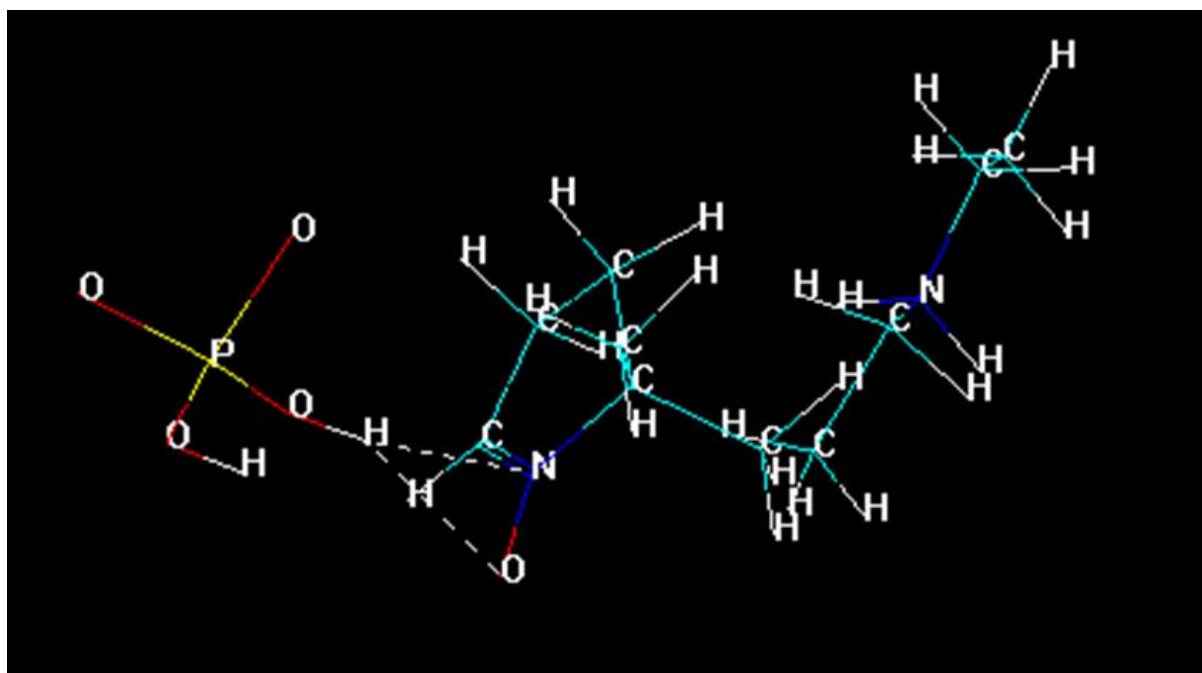

Figure S6

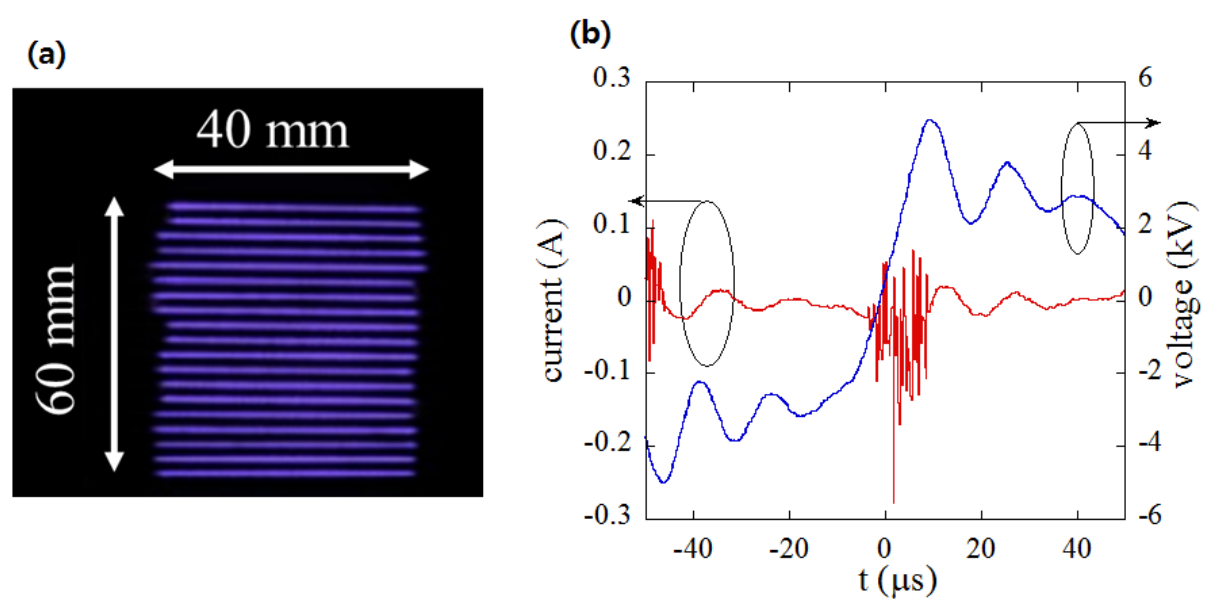

Figure S7

**Table S1.** Secondary structure composition of Hb, determined from Far UV CD spectra in different solvent condition and with different feeding gases at 20 °C determined by K2D3.

| Sample                                      | $\alpha$ -sheet<br>(%) | $\beta$ -sheet<br>(%) |
|---------------------------------------------|------------------------|-----------------------|
| Hb                                          | 69.39                  | 8.3                   |
| Hb + Air                                    | 68.79                  | 7.6                   |
| Hb + N <sub>2</sub>                         | 68.54                  | 7.42                  |
| Hb + NO (10%) + N <sub>2</sub>              | 68.97                  | 7.84                  |
| Hb + O <sub>2</sub>                         | 68.81                  | 7.59                  |
| Hb + He                                     | 68.89                  | 7.82                  |
| Hb + Ar                                     | 68.92                  | 7.8                   |
| Hb + Air + 2% NaCl                          | 69.03                  | 7.52                  |
| Hb + N <sub>2</sub> + 2% NaCl               | 68.95                  | 7.49                  |
| Hb + NO + 2% NaCl                           | 68.79                  | 7.57                  |
| Hb + O <sub>2</sub> + 2% NaCl               | 69.10                  | 7.54                  |
| Hb + He+ 2% NaCl                            | 68.95                  | 7.52                  |
| Hb + Ar+ 2% NaCl                            | 69.05                  | 7.56                  |
| Hb + 2% DEAP                                | 69.00                  | 7.73                  |
| Hb + Air + 2% DEAP                          | 68.98                  | 7.56                  |
| Hb + N <sub>2</sub> + 2% DEAP               | 68.95                  | 7.69                  |
| Hb + NO (10%) + N <sub>2</sub> + 2%<br>DEAP | 69.00                  | 7.67                  |
| Hb + O <sub>2</sub> + 2% DEAP               | 68.96                  | 7.362                 |
| Hb + He+ 2% DEAP                            | 68.99                  | 7.57                  |
| Hb + Ar+ 2% DEAP                            | 69.00                  | 7.63                  |
